# Supplementary material for: Migratory lifestyle carries no added overall energy cost in a partial migratory songbird
Source: PubMed Central journal article supplement (PMC11618079; doi:10.1038/s41559-024-02545-y), 2024-09-18
Supplement: 41559_2024_2545_MOESM1_ESM.pdf [file 41559_2024_2545_MOESM1_ESM.pdf]

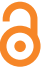

---

# Migratory lifestyle carries no added overall energy cost in a partial migratory songbird

---

In the format provided by the authors and unedited

## 1 **Table-of-content**

- 2 • Supplementary Results for the Comparison of Wintering Sites and Ambient
- 3 Conditions
- 4 • Supplementary Results on the Variability of Heart Rate and Body Temperature
- 5 • Supplementary Results for the Calendar-Based Comparison of Phenotypes
- 6 • Supplementary Results for the Migration Phase-Centred Comparison of Phenotypes
- 7 (Night Only)
- 8 • Supplementary Results for the Investigation of Actual Flight Costs
- 9 • Supplementary Results on the Investigation of Migration Lengths
- 10 • References for Supplementary Results

11

## 12 **Supplementary Results**

### 13 Wintering sites and ambient conditions

14 The estimated wintering sites in birds in the studied population <sup>1</sup> vary considerably in their  
15 distance from the common breeding site from 275 km to 1717 km (median 793 km). During  
16 the last 40 years (fall 1979 to spring 2019), the mean ambient temperature from December to  
17 January was 5.7°C warmer in the wintering grounds than at their breeding site ( $t = -21.56$ ,  $df$   
18  $= 60.65$ ,  $P < 0.01$ , Fig. 1c).

19

### 20 Variability of heart rate and body temperature

21 Heart rate ( $f_H$ ) varies significantly within individuals of migratory and sedentary phenotypes  
22 during the day (coefficient of variance (CV): sedentary 25.86, migratory 26.11) and night (CV:  
23 sedentary 17.62, migratory 20.03), while body temperature ( $T_b$ ) showed considerably less  
24 variation (day: sedentary 1.22, migratory 1.20) (night: sedentary 1.69, migratory 1.57).

25

### 26 Calendar-based comparison of phenotypes

27 *Fall* - Migrant and residents do not differ significantly in  $T_b$  ( $EST = -0.04$ ,  $SE = 0.04$ ,  $Z$   
28  $= -0.79$ ,  $P = 0.79$ , Fig. 2g) or  $f_H$  ( $EST = -9.66$ ,  $SE = 7.89$ ,  $Z = -1.22$ ,  $P = 0.221$ , Fig. 2a).

29

30 *Winter* - Migrants have significantly warmer  $T_b$  ( $EST = 0.18$ ,  $SE = 0.04$ ,  $Z = 3.98$ ,  $P =$   
31  $<0.001$ , Fig. 2h) but we found no differences in  $f_H$  ( $EST = 0.53$ ,  $SE = 7.71$ ,  $Z = 0.07$ ,  $P = 0.945$ ,  
32 Fig. 2b)

33

34 *Spring* - Migrants do not differ in  $T_b$  ( $EST = -0.03$ ,  $SE = 0.05$ ,  $Z = -0.72$ ,  $P = 0.474$ ,  
35 Fig. 2i) or  $f_H$  ( $EST = -7.21$ ,  $SE = 8.33$ ,  $Z = -0.87$ ,  $P = 0.387$ , Fig. 2c)

36

37 *Overall* - Migrants have a higher  $T_b$  ( $EST = 0.11$ ,  $SE = 0.04$ ,  $Z = 2.92$ ,  $P = 0.003$ , Fig.  
38 2j) overall (likely driven by differences in winter) but do not differ in their  $f_H$  ( $EST = 0.94$ ,  $SE$   
39  $= 6.82$ ,  $Z = 0.14$ ,  $P = 0.891$ , Fig. 2e)

40

#### 41 Migration phase-centred comparison of phenotypes (night only)

42 *Fall pre-migration* - Migrants exhibited reduced  $T_b$  at night compared to residents  
43 (Fig. 3g) from 17 days before departure onwards ( $EST = -0.04$ ,  $SE = 0.03$ ,  $F = 1.96$ ) to a  
44 maximum difference at day 4 ( $EST = -0.16$ ,  $SE = 0.03$ ,  $F = 1.96$ ). Simultaneously,  $f_H$  is also  
45 reduced in migrants (Fig. 3a) from 28 days before departure ( $EST = -12.67$ ,  $SE = 7.57$ ,  $F =$   
46  $1.96$ ) with an increasing difference up to the night before departure ( $EST = -60.93$ ,  $SE =$   
47  $11.94$ ,  $F = 1.96$ ).

48

49 *Fall migration* - During migration nights, migrants showed an overall much-elevated  
50  $T_b$  ( $1^\circ\text{C}$ ) ( $EST = 0.97$ ,  $SE = 0.08$ ,  $Z = 12.63$ ,  $P = <0.001$ , Fig. 3h) and  $f_H$  (99bpm) ( $EST =$   
51  $98.75$ ,  $SE = 11.29$ ,  $Z = 8.78$ ,  $P = <0.001$ , Fig. 3b)

52

53 *Fall stopover* - During nocturnal stopover periods, migrants had higher  $T_b$  than their  
54 resident counterparts ( $EST = 0.22$ ,  $SE = 0.08$ ,  $Z = 2.84$ ,  $P = 0.005$ , Fig. 3h), likely because

55 they were in slightly warmer regions already. Heart rate, on the other hand, did not differ  
56 between migrants and residents ( $EST = -15.37$ ,  $SE = 10.89$ ,  $Z = -1.41$ ,  $P = 0.16$ , Fig. 3b).

57

58 *Fall arrival* - Beginning on the second day following arrival on wintering sites,  
59 migrants show a higher  $T_b$  during the night than residents ( $EST = 0.04$ ,  $SE = 0.03$ ,  $F = 1.96$ ,  
60 Fig. 3i). This difference increases for the first two weeks of observation up to a maximum  
61 difference on day 14 ( $EST = 0.12$ ,  $SE = 0.04$ ,  $F = 1.96$ ). After arrival, the nocturnal  $f_H$  of  
62 migrants is lower than that of their resident counterparts ( $EST = -36.27$ ,  $SE = 11.96$ ,  $F = 1.96$ ,  
63 Fig. 3c) for up to the first eight days.

64

65 *Spring pre-migration* - In spring, a pre-migratory metabolic reduction of  $T_b$  and  $f_H$ , in  
66 the order of the decrease during fall, could not be found: Compared to residents, the nocturnal  
67  $T_b$  of migrants is slightly lower from six days to one night before departure ( $EST = -0.11$ ,  $SE$   
68  $= 0.05$ ,  $F = 1.96$ , Fig. 3j). However, this could also be caused by the seasonally increasing  $T_b$   
69 in residents during this time. On the other hand, the  $f_H$  of migrants also shows a slight  
70 reduction from three days before migration to the day after departure ( $EST = -20.36$ ,  $SE =$   
71  $10.93$ ,  $F = 1.96$ , Fig. 3d).

72

73 *Spring migration* - In spring, migrants showed an elevated  $T_b$  during nights containing  
74 migratory flights ( $EST = 0.70$ ,  $SE = 0.06$ ,  $Z = 10.95$ ,  $P = <0.001$ , Fig. 3k). Heart rate was also  
75 higher ( $EST = 135.30$ ,  $SE = 9.60$ ,  $Z = 14.09$ ,  $P = <0.001$ , Fig. 3e) during such nights.

76

77 *Spring stopover* - During spring stopover periods, migrants still exhibited higher  $T_b$   
78 than residents ( $EST = 0.25$ ,  $SE = 0.06$ ,  $Z = 4.14$ ,  $P = <0.001$ , Fig. 3k), but  $f_H$  could not be  
79 found to be different ( $EST = -15.42$ ,  $SE = 8.71$ ,  $Z = -1.77$ ,  $P = 0.08$ , Fig. 3e).

80

81 *Spring arrival* - Following the migrants' arrival in spring back at the breeding site,  
82 their  $T_b$  temporarily drops below the  $T_b$  of residents from day seven to day eleven after arrival  
83 (biggest difference at day eight ( $EST = -0.13$ ,  $SE = 0.07$ ,  $F = 1.96$ , Fig. 3l)). The  $f_H$  is elevated  
84 in migrants from day one ( $EST = 16.98$ ,  $SE = 12.18$ ,  $F = 1.96$ ) up to day three ( $EST = 10.07$ ,  
85  $SE = 8.38$ ,  $F = 1.96$ ) after arrival (Fig. 3f). This is likely to be a higher alertness on the first  
86 night in a relatively unfamiliar environment.

87

### 88 Actual flight costs

89 When only focussing on the measures taken during actual flights during fall and spring  
90 migration, we found  $T_b$  to be even higher ( $EST = 1.23$ ,  $SE = 0.07$ ,  $t = 18.71$ ,  $P = <0.001$ ,  
91 Extended Data Fig. 3d). This is because, often, birds do not migrate the whole night but start  
92 later or end earlier in the middle of the night. This also holds for  $f_H$  ( $EST = 199.41$ ,  $SE =$   
93  $14.46$ ,  $t = 13.79$ ,  $P = <0.001$ , Extended Data Fig. 3c), allowing us to estimate the costs in  
94 terms of  $f_H$  for nocturnal migration in blackbirds. As the  $f_H$  of a resident bird that rests during  
95 migration periods is 374 ( $SE: 9.05$ ) and migratory birds measured simultaneously during a  
96 flight show an  $f_H$  of 573 ( $SE: 12.64$ ), a migrant increases by 53.21%.

97

### 98 Length of migration

99 The median travel time between a migrant's initial departure at the breeding site and the last  
100 migratory event before the core winter (3<sup>rd</sup> December till 17<sup>th</sup> Jan.) was 16 days (1<sup>st</sup> Quantile:  
101 5, 3<sup>rd</sup> Quantile: 26) with a median of 18.5 hours (1<sup>st</sup> Quantile: 13.2, 3<sup>rd</sup> Quantile: 32.4) in  
102 active flight compared to their return migration periods of 9 days in spring (1<sup>st</sup> Quantile: 2.8,  
103 3<sup>rd</sup> Quantile: 21.2) and only 17.5 hours (Md.) (1<sup>st</sup> Quantile: 12, 3<sup>rd</sup> Quantile: 21.4) of active  
104 flight (Supplementary Data Table 9) This discrepancy in time, while having to return to the  
105 same breeding site, could hint that during fall migration, blackbirds fly less orientated to a  
106 specific location and instead perform late fall adjustment migrations if their current location is

107 not suitable anymore. On the contrary, spring migration has a defined target location (the  
108 previous breeding site). Following literature <sup>2,3</sup>, it is approached in a more time-constrained  
109 manner.

110

## 111 **References**

112

- 113 1. Fudickar, A. M., Schmidt, A., Hau, M., Quetting, M. & Partecke, J. Female-biased obligate  
114 strategies in a partially migratory population. *Journal of Animal Ecology* **82**, 863–871  
115 (2013).
- 116 2. Nilsson, C., Klaassen, R. H. G. & Alerstam, T. Differences in speed and duration of bird  
117 migration between spring and autumn. *American Naturalist* **181**, 837–845 (2013).
- 118 3. Schmaljohann, H. & Both, C. The limits of modifying migration speed to adjust to climate  
119 change. *Nature Climate Change* **7**, 573–576 (2017).

120
